# Supplementary material for: Evaluating E-OBS forcing data for large-sample hydrology using model performance diagnostics
Source: Copernicus journal article supplement (doi:10.5194/hess-30-119-2026), 2026-01-13
Supplement: Supplementary file 1 [file hess-30-119-2026-supplement.pdf]

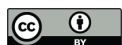

*Supplement of*

## **Evaluating E-OBS forcing data for large-sample hydrology using model performance diagnostics**

**Franziska Clerc-Schwarzenbach and Thiago V. M. do Nascimento**

*Correspondence to:* Thiago V. M. do Nascimento ([thiago.nascimento@eawag.ch](mailto:thiago.nascimento@eawag.ch))

The copyright of individual parts of the supplement might differ from the article licence.

**Contents of this file**

Figures S1 to S6 and Table S1

**Introduction**

This document provides some figures and a table that act as extra information for the paper entitled “Evaluating E-OBS forcing data for large-sample hydrology using model performance diagnostics”.

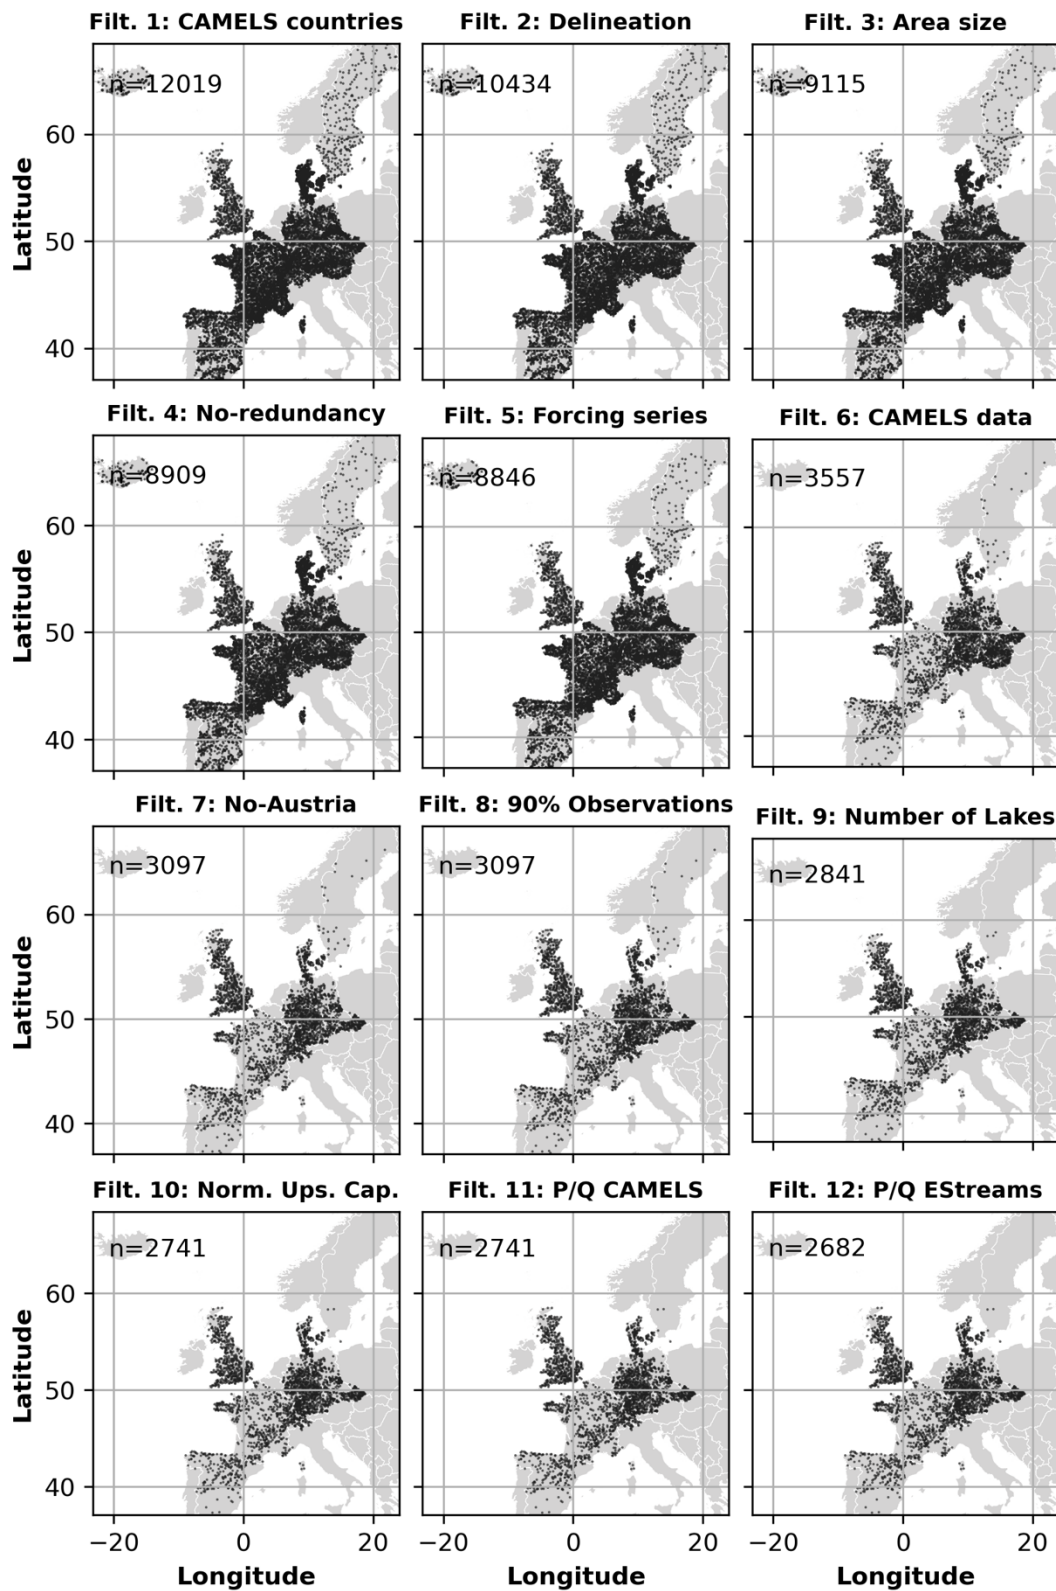

Figure S1: Spatial distribution of the catchments after applying each filter, as described in section 2.1 of the paper.

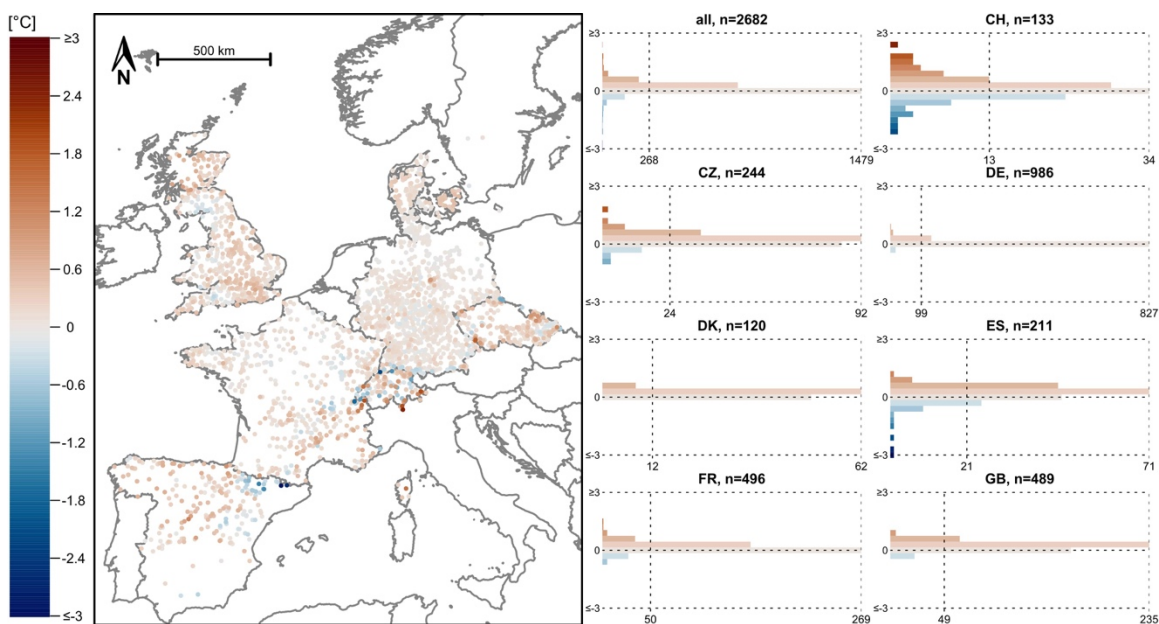

**Figure S2:** Difference in mean annual temperature for each catchment when calculated from the E-OBS and the CAMELS datasets for the 20-year period 1995-2015. Positive values and red colours indicate higher temperatures in the E-OBS data obtained from EStreams, negative values and blue colours indicate lower temperatures in the E-OBS data. Note that the colour scale was cut at  $\pm 3$  °C.

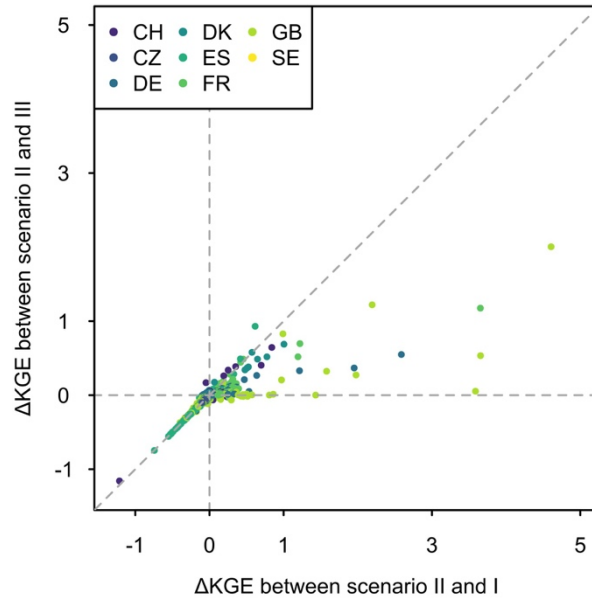

**Figure S3:** Differences in model performance between scenario II and I (positive values indicate higher performances with the E-OBS data obtained from EStreams, negative values indicate higher performances with the CAMELS data) compared to differences in model performance between scenarios II and III (positive values indicate higher performances with the E-OBS data, negative values indicate higher performances when the precipitation data were replaced with those from CAMELS). One catchment (in Great Britain) plotted outside the axis limits (9.9 / 4.5). Pearson's correlation coefficient was 0.87.

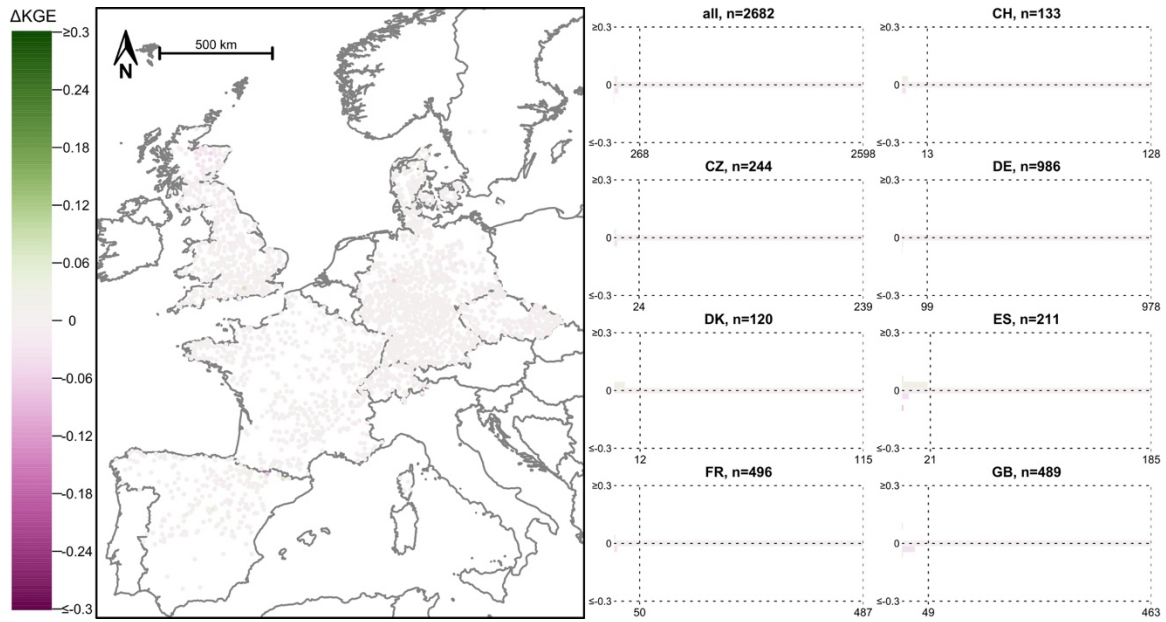

**Figure S4:** Difference in model performance when all meteorological input data were obtained from E-OBS (i.e., EStreams, scenario II) and when the temperature data from E-OBS were replaced with those from CAMELS (scenario V). Positive values and green colours indicate higher model performances with the  $T$  data from E-OBS, negative values and pink colours indicate higher model performances with the  $T$  data from CAMELS. Note that the colour scale was cut at a difference in KGE of  $\pm 0.3$ . The catchments with the largest differences in model performance were plotted last to increase their visibility.

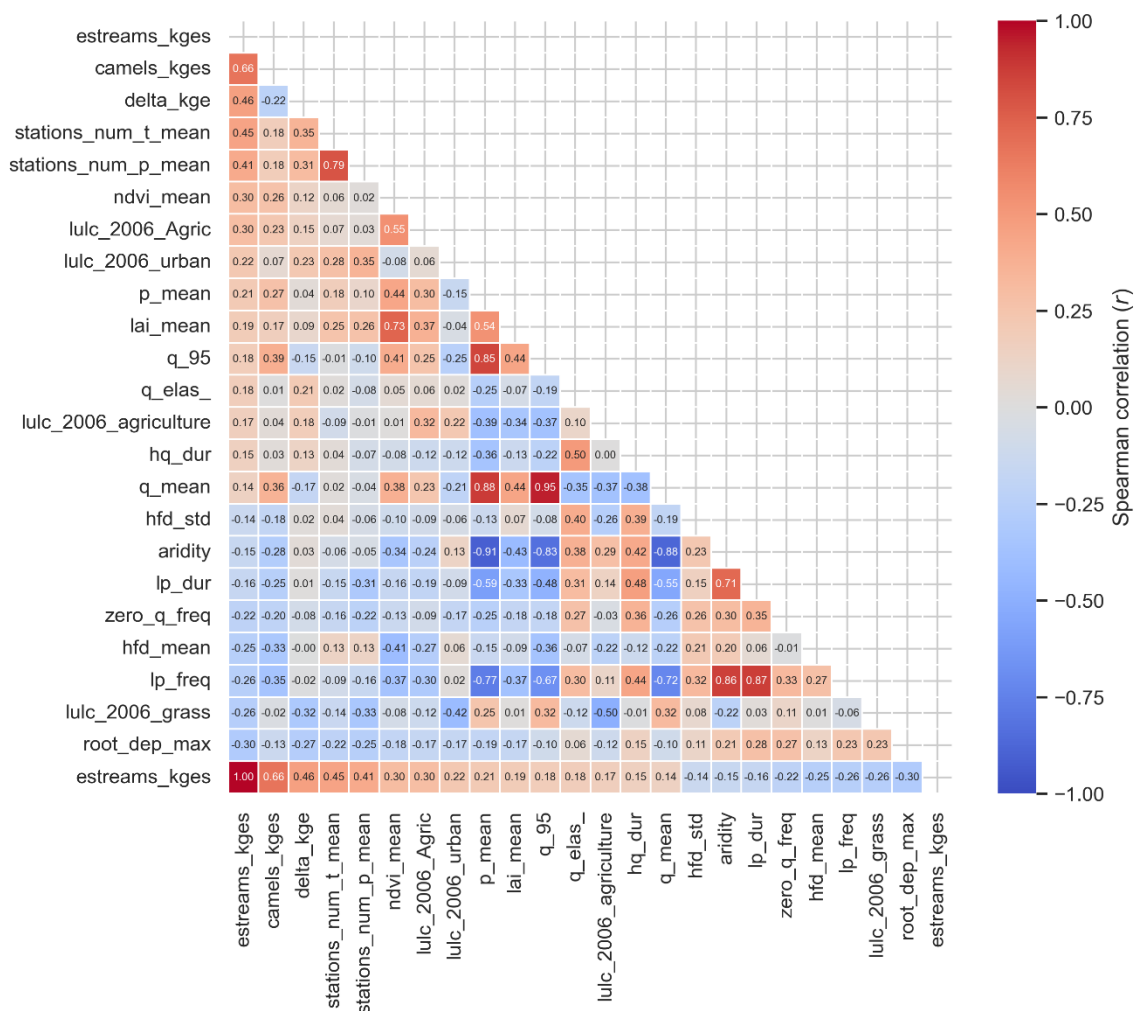

**Figure S5: Heatmap of the correlations of the model performances in scenario I (CAMELS forcing data), in scenario II (EStreams forcing data), and the differences in model performances with the catchment attributes derived from the EStreams dataset. The heatmap shows only the attributes for which the correlation with estreams\_kge showed a Spearman rank correlation above or equal to 0.15. Note that these results are complemented by Table S1.**

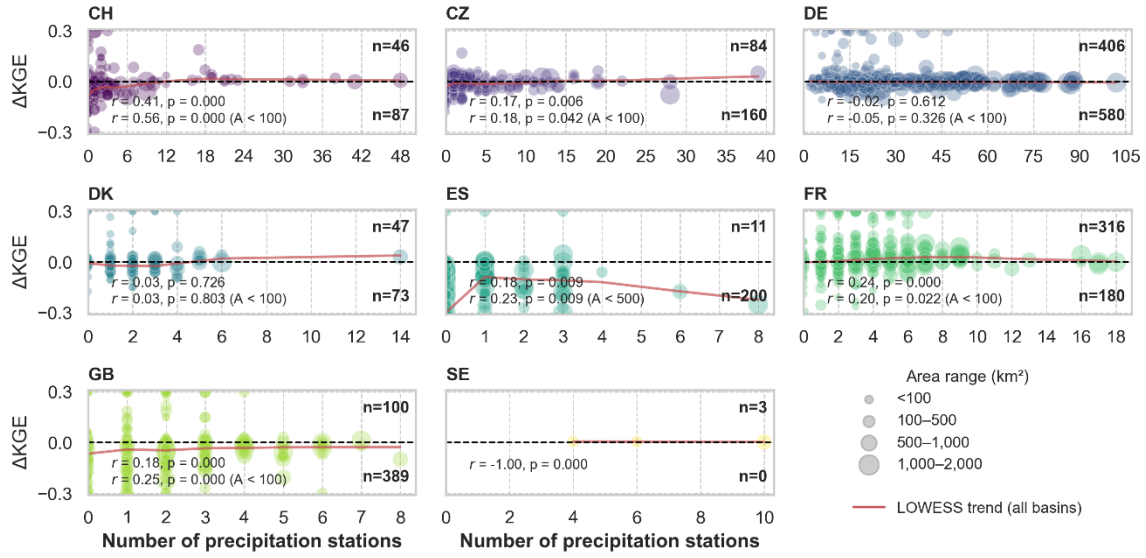

**Figure S6: Scatterplots showing the difference in model performance (Kling-Gupta efficiency, KGE) between scenario II (E-OBS data obtained from EStreams) and scenario I (CAMELS data) (y-axis) versus the number of precipitation stations used to derive the E-OBS precipitation data per country. Each circle represents one catchment. The size of the circle indicates the catchment area. Positive values indicate higher performances when the E-OBS data were used, negative values indicate higher performances when the CAMELS data were used. Note that the y-axes were cut at  $\pm 0.3$ , in accordance with Fig. 6 in the manuscript. Note that the x-axes differ for the different subplots.**



**Table S1: Spearman rank correlations and their respective significance for the model performances in scenario I (camels\_kges), scenario II (estreams\_kges), their differences (delta\_kge), and some catchment attributes available in the EStreams dataset. Significance levels: \*\*\*  $p$ -value < 0.001, \*\*  $p$ -value < 0.01, \*  $p$ -value < 0.05, ns = not significant.**

| variable              | camels_kges<br>es r | camels_kges<br>sig | estreams_kges<br>es r | estreams_kges<br>s sig | delta_kges<br>e r | delta_kges<br>sig |
|-----------------------|---------------------|--------------------|-----------------------|------------------------|-------------------|-------------------|
| estreams_kges         | 0.665               | ***                | 1                     | ***                    | 0.463             | ***               |
| camels_kges           | 1                   | ***                | 0.665                 | ***                    | -0.222            | ***               |
| delta_kges            | -0.222              | ***                | 0.463                 | ***                    | 1                 | ***               |
| stations_num_t_mean   | 0.177               | ***                | 0.447                 | ***                    | 0.355             | ***               |
| stations_num_p_mean   | 0.184               | ***                | 0.412                 | ***                    | 0.307             | ***               |
| ndvi_mean             | 0.262               | ***                | 0.301                 | ***                    | 0.124             | ***               |
| lulc_2006_Agric       | 0.227               | ***                | 0.296                 | ***                    | 0.146             | ***               |
| root_dep_max          | -0.132              | ***                | -0.296                | ***                    | -0.27             | ***               |
| lulc_2006_grass       | -0.025              | ns                 | -0.258                | ***                    | -0.317            | ***               |
| lp_freq               | -0.353              | ***                | -0.257                | ***                    | -0.016            | ns                |
| hfd_mean              | -0.326              | ***                | -0.252                | ***                    | -0.002            | ns                |
| lulc_2006_urban       | 0.066               | ***                | 0.223                 | ***                    | 0.226             | ***               |
| zero_q_freq           | -0.204              | ***                | -0.217                | ***                    | -0.079            | ***               |
| p_mean                | 0.271               | ***                | 0.209                 | ***                    | 0.038             | *                 |
| lai_mean              | 0.172               | ***                | 0.189                 | ***                    | 0.089             | ***               |
| q_95                  | 0.39                | ***                | 0.183                 | ***                    | -0.148            | ***               |
| q_elas                | 0.007               | ns                 | 0.177                 | ***                    | 0.206             | ***               |
| lulc_2006_agriculture | 0.039               | *                  | 0.171                 | ***                    | 0.184             | ***               |
| lp_dur                | -0.252              | ***                | -0.157                | ***                    | 0.008             | ns                |
| aridity               | -0.276              | ***                | -0.154                | ***                    | 0.034             | ns                |
| hq_dur                | 0.027               | ns                 | 0.149                 | ***                    | 0.125             | ***               |
| q_mean                | 0.36                | ***                | 0.143                 | ***                    | -0.175            | ***               |
| hfd_std               | -0.184              | ***                | -0.141                | ***                    | 0.02              | ns                |
| strm_dens             | 0.193               | ***                | 0.136                 | ***                    | -0.063            | **                |
| hp_freq               | -0.295              | ***                | -0.136                | ***                    | 0.082             | ***               |
| slope_sawicz          | 0.188               | ***                | 0.135                 | ***                    | -0.019            | ns                |
| ele_mt_mean           | -0.092              | ***                | -0.129                | ***                    | -0.079            | ***               |
| ele_mt_max            | -0.019              | ns                 | -0.124                | ***                    | -0.148            | ***               |
| ele_mt_min            | -0.157              | ***                | -0.109                | ***                    | 0.009             | ns                |
| hp_dur                | -0.151              | ***                | -0.106                | ***                    | -0.014            | ns                |
| p_seasonality         | -0.219              | ***                | -0.098                | ***                    | 0.118             | ***               |
| root_dep_min          | -0.193              | ***                | -0.083                | ***                    | 0.125             | ***               |

| variable             | camels_kg<br>es r | camels_kges<br>sig | estreams_kg<br>es r | estreams_kge<br>s sig | delta_kg<br>e r | delta_kge<br>sig |
|----------------------|-------------------|--------------------|---------------------|-----------------------|-----------------|------------------|
| soil_fra_silt_mean   | 0.083             | ***                | 0.082               | ***                   | 0.038           | *                |
| q_runoff_ratio       | 0.376             | ***                | 0.08                | ***                   | -0.289          | ***              |
| lakes_num            | 0.099             | ***                | 0.079               | ***                   | -0.012          | ns               |
| lakes_tot_area       | 0.096             | ***                | 0.067               | ***                   | -0.026          | ns               |
| soil_tawc_mean       | 0.112             | ***                | 0.067               | ***                   | 0               | ns               |
| lulc_2006_forest     | -0.005            | ns                 | 0.061               | **                    | 0.064           | ***              |
| soil_bd_mean         | -0.079            | ***                | 0.059               | **                    | 0.155           | ***              |
| lakes_tot_vol        | 0.094             | ***                | 0.059               | **                    | -0.034          | ns               |
| slp_dg_mean          | 0.089             | ***                | -0.053              | **                    | -0.149          | ***              |
| soil_fra_clay_mean   | -0.008            | ns                 | 0.048               | *                     | 0.069           | ***              |
| steep_area_fra       | 0.102             | ***                | -0.048              | *                     | -0.164          | ***              |
| flat_area_fra        | -0.096            | ***                | 0.042               | *                     | 0.138           | ***              |
| sno_cov_mean         | -0.004            | ns                 | -0.039              | *                     | 0.001           | ns               |
| frac_snow            | -0.073            | ***                | -0.035              | ns                    | 0.042           | *                |
| lulc_2006_NonIrrAgri | -0.083            | ***                | 0.035               | ns                    | 0.123           | ***              |
| q_5                  | 0.189             | ***                | 0.034               | ns                    | -0.14           | ***              |
| pet_mean             | -0.21             | ***                | -0.033              | ns                    | 0.127           | ***              |
| baseflow_index       | -0.098            | ***                | -0.028              | ns                    | 0.023           | ns               |
| res_num              | 0.066             | ***                | -0.025              | ns                    | -0.098          | ***              |
| soil_fra_sand_mean   | -0.015            | ns                 | -0.024              | ns                    | -0.021          | ns               |
| soil_oc_mean         | 0.173             | ***                | -0.022              | ns                    | -0.201          | ***              |
| lq_dur               | -0.008            | ns                 | -0.022              | ns                    | -0.032          | ns               |
| lp_time              | 0.061             | **                 | 0.016               | ns                    | -0.075          | ***              |
| hp_time              | -0.088            | ***                | -0.015              | ns                    | 0.071           | ***              |
| dam_num              | 0.07              | ***                | -0.014              | ns                    | -0.09           | ***              |
| lq_freq              | 0.007             | ns                 | -0.014              | ns                    | -0.01           | ns               |
| root_dep_mean        | -0.116            | ***                | -0.008              | ns                    | 0.132           | ***              |
| elon_ratio           | 0                 | ns                 | -0.007              | ns                    | 0.003           | ns               |
| soil_fra_grav_mean   | -0.018            | ns                 | -0.001              | ns                    | -0.023          | ns               |
| hq_freq              | -0.009            | ns                 | -0.001              | ns                    | 0.038           | ns               |
